# Supplementary material
Source: Royal Society of Chemistry journal article supplement (doi:10.1039/d6cp00753h)
Supplement: d6cp00753h1.pdf [file d6cp00753h1.pdf]

## Supplementary Material

### Breaking the Boltzmann Limit in Sub-5 nm Monolayer CdPS<sub>3</sub> Transistors

Manzhou Wang<sup>1</sup>, Yuliang Mao<sup>1,2,\*</sup>

<sup>1</sup>School of Physics and Optoelectronics, Xiangtan University, Hunan 411105, China

<sup>2</sup>State Key Laboratory of Materials for Integrated Circuits, Shanghai Institute of Microsystem and Information Technology, Chinese Academy of Sciences, 865 Changning Road, Shanghai 200050 China

1.  $I$ - $V_g$  curves along the (a) armchair and (b) zigzag directions at different doping concentrations.

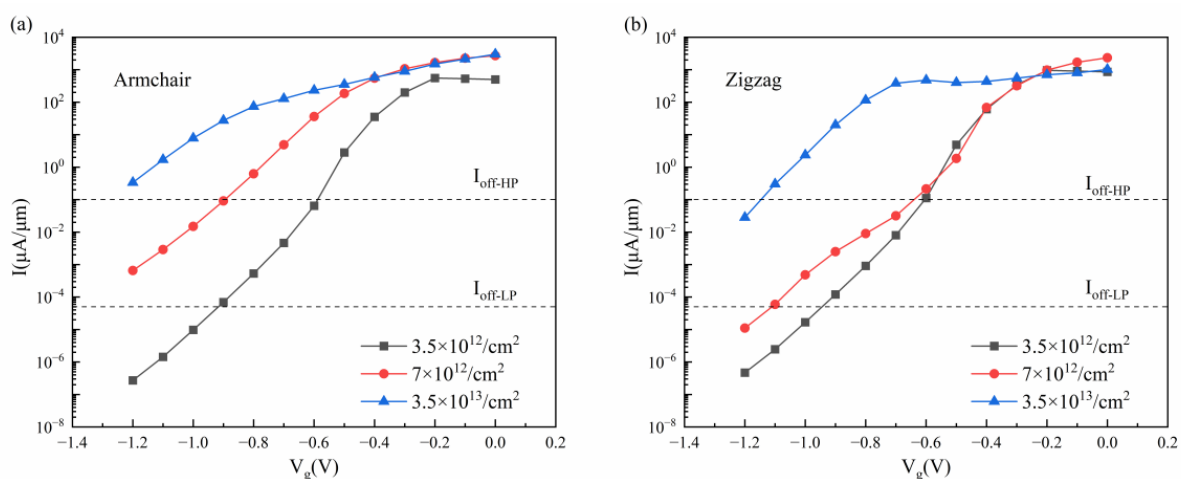

**FIG. S1.**  $I$ - $V_g$  curves along the (a) armchair and (b) zigzag directions at different doping concentrations.

\* Author to whom correspondence should be addressed: ylmao@xtu.edu.cn

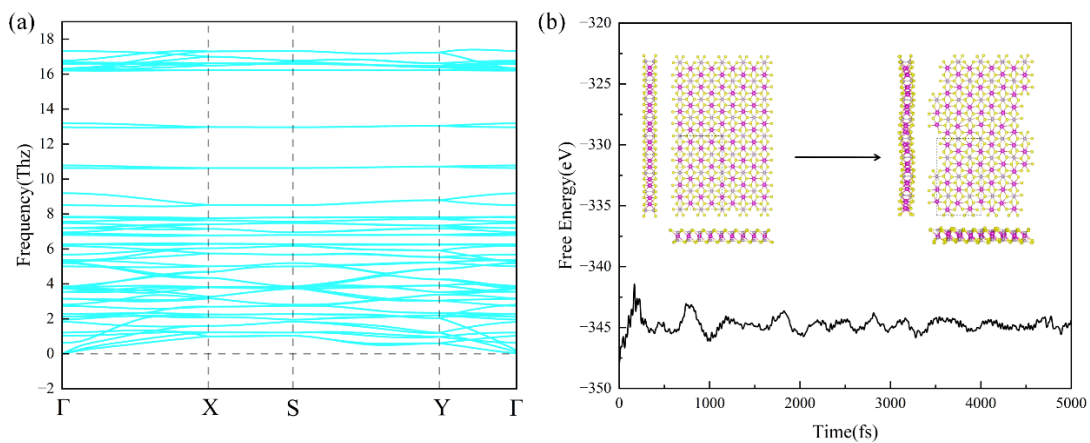

**Fig. S2.** (a) The phonon dispersion spectra of CdPS<sub>3</sub>. (b) The free energy as a function of time during ab initio molecular dynamics (AIMD) simulation of CdPS<sub>3</sub> at 300 K. The inset shows the atomic structure of CdPS<sub>3</sub> before and after heating at 300 K for 5,000 fs.

**TABLE S I.** Performance details of monolayer CdPS<sub>3</sub> transport devices along the armchair direction under ITRS HP standards (off-state current  $I_{\text{off}} = 0.1 \mu\text{A}/\mu\text{m}$ ). Dielectric constant (K), gate length ( $L_g$ ), underlap (UL), on-state current ( $I_{\text{on}}$ ), subthreshold swing (SS), intrinsic delay time ( $\tau$ ), power-delay product (PDP).

| k       | $L_g(\text{nm})$ | UL(nm) | $I_{\text{on}}(\mu\text{A}/\mu\text{m})$ | SS(mV/dec) | $\tau(\text{ps})$ | PDP(fJ/ $\mu\text{m}$ ) |       |
|---------|------------------|--------|------------------------------------------|------------|-------------------|-------------------------|-------|
| 3.9     | 5                | 0      | 1250                                     | 113        | 0.212             | 0.17                    |       |
|         |                  | 1      | 2020                                     | 83         | 0.108             | 0.139                   |       |
|         |                  | 2      | 1380                                     | 78         | 0.168             | 0.148                   |       |
|         | 3                | 1      | 744                                      | 147        | 0.244             | 0.116                   |       |
|         |                  | 2      | 991                                      | 116        | 0.165             | 0.104                   |       |
|         |                  | 3      | 657                                      | 103        | 0.263             | 0.11                    |       |
|         | 2                | 2      | 707                                      | 157        | 0.201             | 0.09                    |       |
|         |                  | 3      | 560                                      | 116        | 0.246             | 0.088                   |       |
|         |                  | 3      | 459                                      | 153        | 0.241             | 0.071                   |       |
|         | 1                | 4      | 3                                        | 459        | 153               | 0.241                   | 0.071 |
|         |                  |        | 4                                        | 311        | 131               | 0.354                   | 0.071 |
|         |                  |        | 0                                        | 2680       | 98                | 0.131                   | 0.225 |
| 1       |                  |        | 2800                                     | 79         | 0.12              | 0.216                   |       |
| 25      | 5                | 2      | 2180                                     | 74         | 0.15              | 0.21                    |       |
|         |                  | 3      | 1400                                     | 126        | 0.183             | 0.164                   |       |
|         |                  | 2      | 1730                                     | 101        | 0.155             | 0.171                   |       |
|         | 3                | 3      | 1320                                     | 92         | 0.189             | 0.16                    |       |
|         |                  | 2      | 1190                                     | 133        | 0.165             | 0.125                   |       |
|         |                  | 3      | 560                                      | 116        | 0.257             | 0.092                   |       |
| 1       | 4                | 3      | 867                                      | 130        | 0.2               | 0.111                   |       |
|         |                  | 4      | 779                                      | 111        | 0.238             | 0.118                   |       |
| ITRS HP | 5.1              | -      | 900                                      | -          | 0.423             | 0.24                    |       |

**TABLE S II.** Performance details of monolayer CdPS<sub>3</sub> transport devices along the zigzag direction under ITRS HP standards (off-state current  $I_{\text{off}} = 0.1 \mu\text{A}/\mu\text{m}$ ). Dielectric constant (K), gate length ( $L_g$ ), underlap (UL), on-state current ( $I_{\text{on}}$ ), subthreshold swing (SS), intrinsic delay time ( $\tau$ ), power-delay product (PDP).

| k       | $L_g(\text{nm})$ | UL(nm) | $I_{\text{on}}(\mu\text{A}/\mu\text{m})$ | SS(mV/dec) | $\tau(\text{ps})$ | PDP(fJ/ $\mu\text{m}$ ) |       |
|---------|------------------|--------|------------------------------------------|------------|-------------------|-------------------------|-------|
| 3.9     | 5                | 0      | 2450                                     | 79         | 0.132             | 0.207                   |       |
|         |                  | 1      | 2130                                     | 72         | 0.137             | 0.187                   |       |
|         |                  | 2      | 1270                                     | 55         | 0.217             | 0.177                   |       |
|         | 3                | 1      | 1120                                     | 103        | 0.186             | 0.134                   |       |
|         |                  | 2      | 794                                      | 52         | 0.217             | 0.11                    |       |
|         |                  | 3      | 323                                      | 71         | 0.512             | 0.106                   |       |
|         | 2                | 2      | 750                                      | 245        | 0.211             | 0.101                   |       |
|         |                  | 3      | 243                                      | 64         | 0.585             | 0.091                   |       |
|         |                  | 4      | 54                                       | 169        | 2.103             | 0.073                   |       |
|         | 25               | 5      | 0                                        | 2380       | 62                | 0.16                    | 0.243 |
|         |                  |        | 1                                        | 2520       | 51                | 0.137                   | 0.222 |
|         |                  |        | 2                                        | 1900       | 38                | 0.213                   | 0.259 |
| 3       |                  | 1      | 1480                                     | 95         | 0.17              | 0.161                   |       |
|         |                  | 2      | 1590                                     | 57         | 0.169             | 0.172                   |       |
|         |                  | 3      | 1170                                     | 48         | 0.219             | 0.164                   |       |
| 2       |                  | 2      | 1340                                     | 139        | 0.19              | 0.163                   |       |
|         |                  | 3      | 361                                      | 64         | 0.768             | 0.178                   |       |
|         |                  | 4      | 812                                      | 87         | 0.233             | 0.121                   |       |
| 1       |                  | 3      | 812                                      | 87         | 0.233             | 0.121                   |       |
|         |                  | 4      | 64                                       | 107        | 1.593             | 0.065                   |       |
| ITRS HP |                  | 5.1    | -                                        | 900        | -                 | 0.423                   | 0.24  |

**Table S III.** Performance details of monolayer CdPS<sub>3</sub> transport devices along the armchair direction under IRDS HP standards (off-state current  $I_{\text{off}} = 0.01 \mu\text{A}/\mu\text{m}$ ). Dielectric constant (K), gate length ( $L_g$ ), underlap (UL), on-state current ( $I_{\text{on}}$ ), subthreshold swing (SS), intrinsic delay time ( $\tau$ ), power-delay product (PDP).

| k       | $L_g(\text{nm})$ | UL(nm) | $I_{\text{on}}(\mu\text{A}/\mu\text{m})$ | SS(mV/dec) | $\tau(\text{ps})$ | PDP(fJ/ $\mu\text{m}$ ) |
|---------|------------------|--------|------------------------------------------|------------|-------------------|-------------------------|
| 3.9     | 5                | 0      | 693                                      | 112        | 0.377             | 0.167                   |
|         |                  | 1      | 1318                                     | 84         | 0.199             | 0.168                   |
|         |                  | 2      | 1093                                     | 79         | 0.218             | 0.152                   |
|         | 3                | 1      | 275                                      | 145        | 0.647             | 0.114                   |
|         |                  | 2      | 645                                      | 116        | 0.265             | 0.109                   |
|         |                  | 3      | 463                                      | 103        | 0.354             | 0.105                   |
|         | 2                | 2      | 135                                      | 179        | 0.935             | 0.081                   |
|         |                  | 3      | 354                                      | 133        | 0.365             | 0.083                   |
|         | 1                | 3      | -                                        | 152        | -                 | -                       |
|         |                  | 4      | -                                        | 131        | -                 | -                       |
| 25      | 5                | 0      | 1243                                     | 105        | 0.274             | 0.218                   |
|         |                  | 1      | 2121                                     | 76         | 0.162             | 0.22                    |
|         |                  | 2      | 1878                                     | 74         | 0.182             | 0.218                   |
|         | 3                | 1      | 356                                      | 137        | 0.66              | 0.15                    |
|         |                  | 2      | 1121                                     | 102        | 0.221             | 0.159                   |
|         |                  | 3      | 1046                                     | 87         | 0.246             | 0.165                   |
|         | 2                | 2      | 334                                      | 131        | 0.545             | 0.116                   |
|         |                  | 3      | 895                                      | 109        | 0.25              | 0.143                   |
|         | 1                | 3      | 322                                      | 130        | 0.525             | 0.108                   |
|         |                  | 4      | 467                                      | 111        | 0.396             | 0.118                   |
| IRDS HP | 12               | -      | 924                                      | 75         | 0.78              | 0.47                    |

**Table S IV.** Performance details of monolayer CdPS<sub>3</sub> transport devices along the zigzag direction under IRDS HP standards (off-state current  $I_{\text{off}} = 0.01 \mu\text{A}/\mu\text{m}$ ). Dielectric constant (K), gate length ( $L_g$ ), underlap (UL), on-state current ( $I_{\text{on}}$ ), subthreshold swing (SS), intrinsic delay time ( $\tau$ ), power-delay product (PDP).

| k       | $L_g(\text{nm})$ | UL(nm) | $I_{\text{on}}(\mu\text{A}/\mu\text{m})$ | SS(mV/dec) | $\tau(\text{ps})$ | PDP(fJ/ $\mu\text{m}$ ) |       |
|---------|------------------|--------|------------------------------------------|------------|-------------------|-------------------------|-------|
| 3.9     | 5                | 0      | 1249                                     | 64         | 0.247             | 0.197                   |       |
|         |                  | 1      | 1521                                     | 73         | 0.187             | 0.182                   |       |
|         |                  | 2      | 1006                                     | 37         | 0.225             | 0.145                   |       |
|         | 3                | 1      | 128                                      | 103        | 1.63              | 0.134                   |       |
|         |                  | 2      | 381                                      | 52         | 0.466             | 0.114                   |       |
|         |                  | 3      | 296                                      | 71         | 0.629             | 0.119                   |       |
|         | 2                | 2      | 61                                       | 160        | 2.52              | 0.098                   |       |
|         |                  | 3      | 193                                      | 65         | 0.741             | 0.091                   |       |
|         | 1                | 3      | -                                        | 94         | -                 | -                       |       |
|         |                  | 4      | -                                        | 169        | -                 | -                       |       |
|         | 25               | 5      | 0                                        | 1964       | 62                | 0.202                   | 0.254 |
|         |                  |        | 1                                        | 2672       | 51                | 0.147                   | 0.252 |
| 2       |                  |        | 2253                                     | 38         | 0.164             | 0.237                   |       |
| 3       |                  | 1      | 674                                      | 96         | 0.415             | 0.179                   |       |
|         |                  | 2      | 1215                                     | 57         | 0.244             | 0.189                   |       |
|         |                  | 3      | 993                                      | 48         | 0.287             | 0.182                   |       |
| 2       |                  | 2      | 708                                      | 140        | 0.346             | 0.157                   |       |
|         |                  | 3      | 506                                      | 65         | 0.467             | 0.151                   |       |
| 1       |                  | 3      | 451                                      | 87         | 0.449             | 0.13                    |       |
|         |                  | 4      | 52                                       | 107        | 2.006             | 0.067                   |       |
| IRDS HP |                  | 12     | -                                        | 924        | 75                | 0.78                    | 0.47  |
